# Supplementary material for: Mesoporous bioactive glass-coated poly(l-lactic acid) scaffolds: a sustained antibioticdrug release system for bone repairing
Source: Royal Society of Chemistry journal article supplement (doi:10.1039/c0jm02179b), 2010-11-29
Supplement: c0jm02179b.pdf [file c0jm02179b.pdf]

## Supporting Information

*Min Zhu<sup>a</sup>, Lingxia Zhang<sup>a</sup>, Qianjun He<sup>a</sup>, Jinjin Zhao<sup>a</sup>, Guo Limin<sup>a</sup>, Jianlin Shi<sup>\*a</sup>*

### 1. Water contact angle test

The video in the supporting information file recorded the whole process of testing the water contact angle on PM-9 scaffolds. The water drop infiltrated completely into the scaffold immediately after contacting to it. This result demonstrated the effectiveness of MBG layer in improving the hydrophilicity of PLLA scaffolds.

### 2. FTIR spectra of the different scaffolds before and after GS loading

After up-taking GS molecules, all the scaffolds showed the absorption bands of amino groups at  $620\text{ cm}^{-1}$  (out-of-plane bending vibration) and  $1500\text{ cm}^{-1}$  (formation vibration), which indicated that GS drugs were successfully loaded. In the spectra of MBG-coated scaffolds, as it can be observed in Fig.1S (b, c, d), the Si–O–H band ( $964\text{ cm}^{-1}$ ) present in PM scaffolds mostly disappeared after GS adsorption, which illustrated that GS molecules had interacted with Si–OH groups by hydrogen bonding.

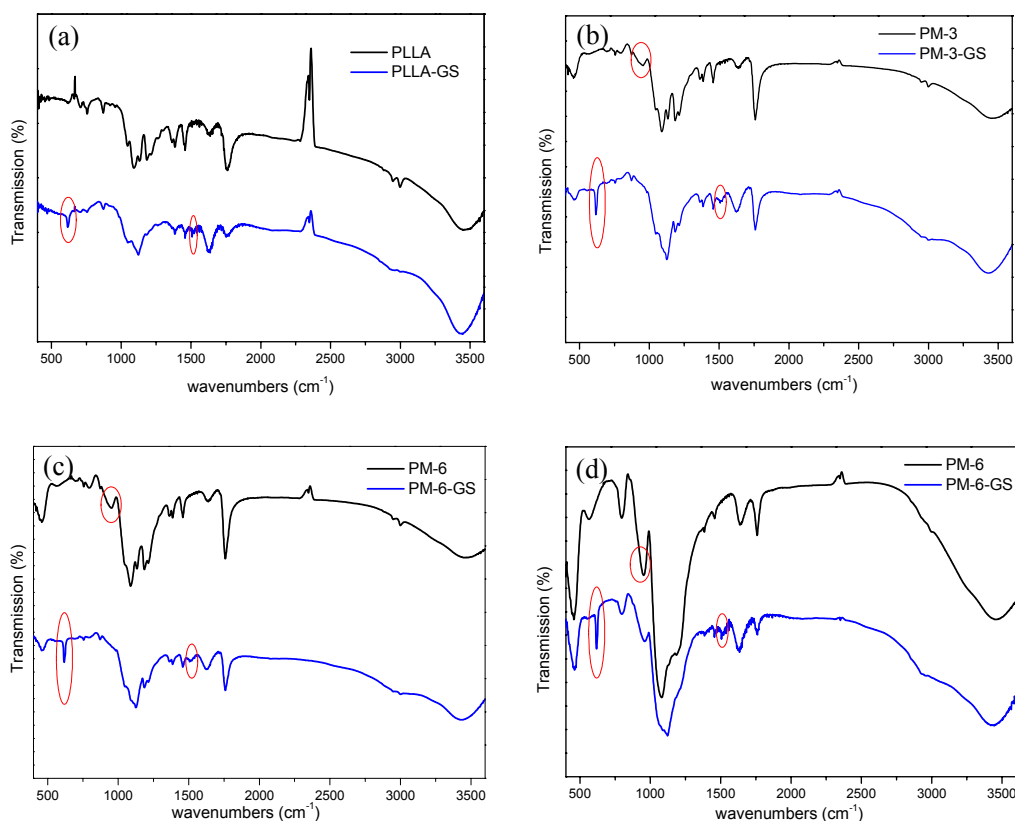

Fig.1S FT-IR spectrograms of various scaffolds before and after GS loading, red circles point out changes of absorption peaks.

### 3. ICP-AES analysis of the extracted products

Measurements of Si, Ca, P concentrations in the extracted products were carried out through Inductively Coupled Plasma Atomic Emission Spectroscopy (ICP-AES), and results were showed in Table.1S. Compared with phosphorus and silicon, the calcium component was prone to be washed away from the Si-O-Si network due to the unmatched ionic radii of Ca<sup>2+</sup> and Si<sup>4+</sup>. The percentages of Si, Ca and P species losses from the whole MBG coating to the extract solution were theoretically calculated according to the values of MBG fraction of the composites, ICP-AES results and other parameters of extraction. It was

observed that part of Ca and P components still remained in the coating. From PM-3 to PM-9, higher MBG fractions in the composites corresponded to less losses of calcium and phosphorus, because much thicker MBG layers prevented the inner MBG from the quick loss of Ca and P components.

Table.1S Molar ratios and percentages lost in the extract solutions of Si, Ca, P components for composite scaffolds during extracting process.

| Samples | Si/Ca/P molar ratio | Percentages of Si, Ca and P lost (%) |      |      |
|---------|---------------------|--------------------------------------|------|------|
|         |                     | Si                                   | Ca   | P    |
| PM-3    | 1/2.30/0.79         | 5.50                                 | 67.8 | 35.1 |
| PM-6    | 1/3.63/1.29         | 2.77                                 | 54.5 | 29.1 |
| PM-9    | 1/4.75/1.45         | 1.37                                 | 36.3 | 16.1 |

#### 4. TG-DTA analysis of degraded composites

After 21 days *in vitro* treatment in SBF, the contributions to weight changes of the composites, including the two competing processes of polymer/MBG degradation and hydroxyapatite deposition, were evaluated through thermogravimetric analysis. The degraded polymer mass ( $\Delta m_{\text{PLLA}}$ ) and decreased mass of the whole scaffold ( $\Delta m$ ) were calculated following the equations below.

$$\Delta m_{\text{PLLA}} = m_1 * W_{p1}\% - m_2 * W_{p2}\% \quad S1$$

$$\Delta m = m_1 - m_2 = m_1 * (1 - WL\%) \quad S2$$

In Equation S1,  $m_1$  and  $m_2$  are the mass of the composite before or after treatment in SBF respectively;  $W_{p1}\%$  and  $W_{p2}\%$  are the PLLA percentage of the composite before or after treatment in SBF respectively.

In Equation.S2, WL% is the mass loss percentage of the composite.

Comparing  $\Delta m_{\text{PLLA}}$  and  $\Delta m$ , we can conclude that the deposition of hydroxyapatite could not compensate for the loss of the composite scaffolds due to the degradation of polymer and MBG.

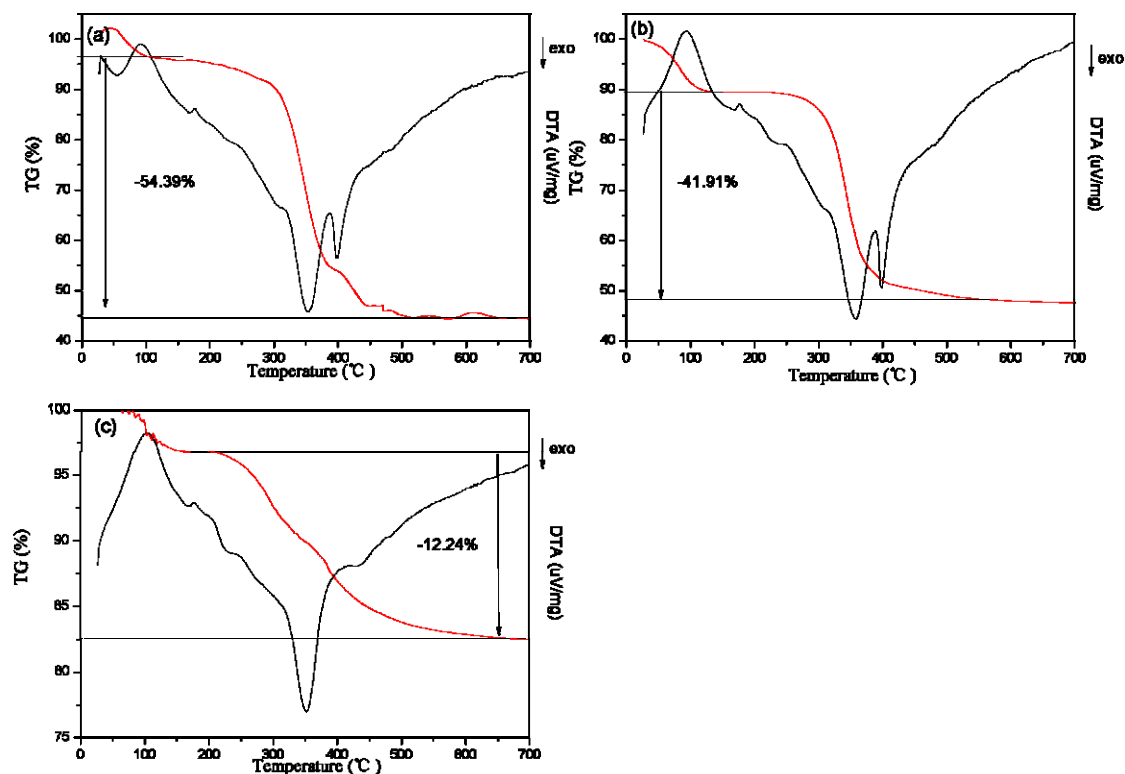

Fig.2S TG-DTA curves of the composites after 3 week treatments in SBF, (a) PM-3, (b) PM-6, (c) PM-9 scaffolds.

Table.2S Parameters in Equation S1, S2 for the three composite scaffolds during SBF treatment.

| Samples    | PM-3    | PM-6    | PM-9   |
|------------|---------|---------|--------|
| $m_1$      | 1 g     | 1 g     | 1 g    |
| WL%        | 10.1%   | 11.7%   | 12.0%  |
| $m_2$      | 0.899 g | 0.883 g | 0.88 g |
| $W_{p1}\%$ | 65.5%   | 55.2%   | 27.8%  |
| $W_{p2}\%$ | 54.4%   | 41.9%   | 12.2%  |

|                          |         |         |         |
|--------------------------|---------|---------|---------|
| $\Delta m_{\text{PLLA}}$ | 0.166 g | 0.182 g | 0.171 g |
| $\Delta m$               | 0.101 g | 0.117 g | 0.120 g |

## 5. Gel Permeation Chromatography

The  $M_w$  of PLLA remained in the composites after extraction were estimated by Gel Permeation Chromatography (Spectra Physics SP-8430, waters 2414 detector). The hybrid scaffolds were dissolved using  $\text{CHCl}_3$  and after the centrifugation the supernatant were subjected to be examined. Chromatographic separations were carried out with a polystyrene gel column (Waters Styragel; bead size = 5  $\mu\text{m}$ ; column size = 7.8 mm internal diameter = 300 mm) using  $\text{CHCl}_3$  as a solvent (flow rate: 1.0 ml/min). The temperature of column was maintained at 30°C.

Table.3S give the molecular weight of PLLA in the composite scaffolds, which revealed the degradation of PLLA during preparation, especially in the P123 extraction using EtOH and HCl. The  $M_w$  of PLLA in different PM scaffolds was almost the same at around 42,000 after treated in EtOH and HCl. The values were a little lower than the original 50,000 we used to prepare these scaffolds which demonstrated some degradations.

Table.3S Results obtained from GPC to evaluate the  $M_w$  changes of PLLA in the composites

| Samples | $M_w$ | $M_n$ | PD ( $M_w/M_n$ ) |
|---------|-------|-------|------------------|
| PM-3    | 41053 | 24506 | 1.675            |
| PM-6    | 41811 | 29369 | 1.424            |
| PM-9    | 41629 | 27658 | 1.505            |
